# Supplementary material
Source: PubMed Central journal article supplement (PMC2950439)
Supplement: supp_76_19_6470__1.pdf [file supp_76_19_6470__1.pdf]

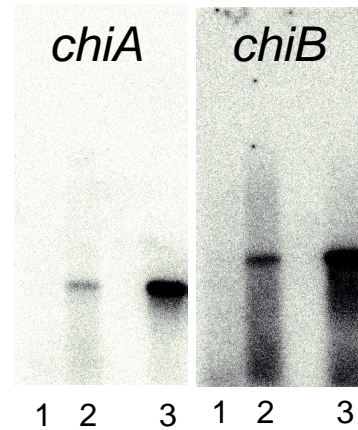

Supplementary data. FIG S-1. Expression of *chiA* and *chiB* of *Listeria monocytogenes* EGD is below the level of detection at 37 °C in BHI growth medium. Northern blot analysis of *chiA* and *chiB* transcripts. RNA was isolated from wild type cells grown in BHI at 37 °C (lane 1) or LB broth supplemented with 0,25 % (W/V) chitin at 37°C (lane 2) or 30°C (lane 3) to late log phase. The results presented are representative of two independent experiments.
